1 **Title:** The sound of restored soil: Measuring soil biodiversity in a forest restoration  
2 chronosequence with ecoacoustics

3

4 **Running Head:** Soil ecoacoustics in forest restoration

5

6 Jake M. Robinson<sup>1\*</sup>, Martin F. Breed<sup>1</sup>, and Carlos Abrahams<sup>2,3</sup>

7

8 <sup>1</sup>College of Science and Engineering, Flinders University, Bedford Park, SA 5042,  
9 Australia

10 <sup>2</sup>Biosciences Department, School of Science and Technology, Clifton Campus,  
11 Nottingham Trent University, Nottingham, NG11 8NS, UK

12 <sup>3</sup> Baker Consultants Ltd, Cromford, Derbyshire, DE4 5JJ, UK

13

14 **\*Correspondence:** Jake Robinson [jake.robinson@flinders.edu.au](mailto:jake.robinson@flinders.edu.au)

15

16 **Author contributions:** JMR and CA conceived and designed the study; JMR and CA  
17 undertook the fieldwork; JMR did the formal data analysis and produced the  
18 visualisations; JMR wrote the original manuscript; JMR, CA, and MFB contributed to  
19 editing the manuscript; JMR, CA, and MFB reviewed the manuscript.

20

21 **ORCID:**

22 JMR: 0000-0001-8108-3271

23 MFB: 0000-0001-7810-9696

24 CA: 0000-0003-0301-5585

25

26 **Abstract** | Forest restoration requires monitoring to assess changes in above- and  
27 below-ground communities, which is challenging due to practical and resource  
28 limitations. With emerging sound recording technologies, ecological acoustic survey  
29 methods—also known as ‘ecoacoustics’—are increasingly available. These provide a  
30 rapid, effective, and non-intrusive means of monitoring biodiversity. Above-ground  
31 ecoacoustics is increasingly widespread, but soil ecoacoustics has yet to be utilised  
32 in restoration despite its demonstrable effectiveness at detecting meso- and  
33 macrofauna acoustic signals. This study applied ecoacoustic tools and indices  
34 (Acoustic Complexity Index, Normalised Difference Soundscape Index, and  
35 Bioacoustic Index) to measure above- and below-ground biodiversity in a forest  
36 restoration chronosequence. We hypothesised that higher acoustic complexity,  
37 diversity and high-frequency to low-frequency ratio would be detected in restored  
38 forest plots. We collected  $n = 198$  below-ground samples and  $n = 180$  ambient and  
39 controlled samples from three recently degraded (within 10 years) and three restored  
40 (30-51 years ago) deciduous forest plots across three monthly visits. We used passive  
41 acoustic monitoring to record above-ground biological sounds and a below-ground  
42 sampling device and sound-attenuation chamber to record soil communities. We  
43 found that restored plot acoustic complexity and diversity were higher in the sound-  
44 attenuation chamber soil but not *in situ* or above-ground samples. Moreover, we found  
45 that restored plots had a significantly greater high-frequency to low-frequency ratio for  
46 soil, but no such association for above-ground samples. Our results suggest that  
47 ecoacoustics has the potential to monitor below-ground biodiversity, adding to the  
48 restoration ecologist’s toolkit and supporting global ecosystem recovery.

49  
50 **Keywords:** Ecosystem restoration; Ecoacoustics; Bioacoustics; Restoration Ecology;  
51 Innovation; UN Decade of Ecosystem Restoration

## 52 **Implications for Practice**

- 53 • This is the first known study to assess the sounds of soil biodiversity in a forest  
54 restoration context, paving the way for more comprehensive studies and  
55 practical applications to support global ecosystem recovery.
- 56 • Soil ecoacoustics has the potential to support restoration ecology/biodiversity  
57 assessments, providing a minimally intrusive, cost-effective and rapid surveying  
58 tool. The methods are also relatively simple to learn and apply.
- 59 • Ecoacoustics can contribute toward overcoming the profound challenge of  
60 quantifying the effectiveness (i.e., success) of forest restoration interventions in  
61 reinstating target species, functions and so-called 'services' and reducing  
62 disturbance.

63

64

65

66

## 67 **Introduction**

68 In the absence of large-scale ecosystem restoration and effective monitoring  
69 strategies, 95% of the Earth's land is projected to be degraded by 2050 (Yu et al.  
70 2020). This includes forests—ecosystems that comprise a combination of species,  
71 geology and climatic processes in which trees are the dominant vegetation type  
72 (Kimmins 2004; Glatthorn et al. 2021; Seidl and Turner 2022). The integrity of forest  
73 ecosystems depends on a rich tapestry of biodiversity (Müller 2000; Watson et al.  
74 2018). Microscopic organisms or 'microbiota' provide forest trees with nutrients and  
75 the ability to communicate via mycorrhizae (Simard 2018; Robinson et al. 2021), and  
76 soil meso- and macrofauna contribute to soil formation and energy flows (Le Bayon et  
77 al. 2021). The strength and complexity of the relationships between organisms confer  
78 resilience to forest ecosystems. Without this complexity, the integrity of forests  
79 diminishes, and their capacity to respond to environmental stressors, such as extreme  
80 heat caused by climate change, is inhibited (Messier et al. 2019; Pardos et al. 2021).  
81 Deforestation—the purposeful clearing of forested land—now occurs at a rapid pace  
82 globally. Indeed, the tropics alone lost 12.2 million ha of tree coverage in 2020, an  
83 area three times the size of the Netherlands (Sama 2021; Gola et al. 2022).  
84 Deforestation contributes to global species extinctions, which are currently occurring  
85 at 1,000 times higher than the natural background rate (De Vos 2015). Deforestation  
86 also reduces key functional elements (so-called 'ecosystem services') that benefit  
87 humans, such as stormwater management, climate regulation, sustainable resources  
88 and recreational amenities (Li et al. 2007; Taye et al. 2021). Therefore, effective forest  
89 restoration strategies are vital to biodiversity and human wellbeing.

90

## Soil ecoacoustics in forest restoration

91 Forest restoration is often conceptualised as intervening to convert a degraded forest  
92 starting point to an endpoint that is an idealised natural forest, whilst recognising that  
93 restoring functions is a priority (Stantfurt et al. 2014). However, a profound challenge  
94 in this process is quantifying the effectiveness (i.e. success) of forest restoration  
95 interventions in reinstating target species, functions and ‘services’ (Camarretta et al.  
96 2020), and reducing further disturbance. Indeed, ecosystem restoration can be viewed  
97 as a continuum of stages from planning to implementation to monitoring (Robinson et  
98 al. 2022). The monitoring stage plays a crucial role in quantifying the effectiveness of  
99 restoration interventions by measuring recovery and potential ongoing disturbance (de  
100 Almeida et al. 2020). Primary observations and derived measurements of changes in  
101 biodiversity status are considered fundamental to monitoring the effectiveness of  
102 restoration strategies (Breed et al. 2019; Hansen et al. 2021). This is exemplified by  
103 GEO BON Essential Biodiversity Variables (EBVs), which provide the first level of  
104 abstraction between low-level observations and high-level indicators of biodiversity  
105 (Kissling et al. 2018). However, acquiring these EBVs, which include genetic  
106 composition, species populations, species traits, community composition, ecosystem  
107 functioning and ecosystem structure (O’Connor et al. 2020), via traditional survey  
108 methods can be time and resource-intensive and potentially intrusive (Gollan et al.  
109 2013; Beng et al. 2020; Hoban et al. 2022).

110

111 Due to these constraints, forest restoration data are often limited to visible macro-  
112 organisms, particularly the trees and other floral and faunal assemblages above-  
113 ground (Stoddard et al. 2011; Williams-Linera et al. 2021). Moreover, ecological data  
114 are often ambiguous and, therefore, incompatible with further research (Zipkin et al.  
115 2021). With the advent of new sound recording technologies, ecological acoustic

116 survey methods, also known as ‘ecoacoustics’, are becoming increasingly available  
117 (Abrahams and Geary 2020; Abrahams et al. 2021; Müller et al. 2022). They can  
118 provide effective and non-invasive approaches to gathering biodiversity data—e.g. on  
119 target species, assemblages and environmental variables essential to restoration  
120 monitoring (Teixeira et al. 2019; Stowell and Sueur 2020). In recent years,  
121 ecoacoustics has been applied to monitor elusive species in several environmental  
122 contexts—particularly in conservation biology (Teixeira et al. 2019; Stowell and Sueur  
123 2020). For instance, passive acoustic monitoring (often shortened to ‘PAM’), which  
124 involves deploying autonomous acoustic sensors, has been used to collect recordings  
125 of biological sounds (known as ‘biophony’) from bats (Hintze et al. 2021; López-  
126 Baucells et al. 2021), birds (Abrahams 2019; Abrahams and Geary 2021), and  
127 invertebrates (Harvey et al. 2011; van der Mescht et al. 2021; Mankin et al. 2022) in  
128 terrestrial environments; and cetaceans (Jones et al. 2020; Guidi et al. 2021),  
129 amphibians (Gan et al. 2020), crustaceans (Kühn et al. 2022), and fish (Popper and  
130 Hawkins 2019) in aquatic environments. Indeed, ecoacoustics has emerged as an  
131 efficient tool to measure and monitor biodiversity and has the potential to enhance the  
132 toolbox of restoration ecologists. Moreover, the same audio recording devices can  
133 detect anthropogenic noise (known as ‘anthrophony’) (de Framond and Brumm 2022).  
134 Anthrophony may contribute to ecosystem degradation by adversely affecting animal  
135 fitness, health (De Jong et al. 2018; Kleist et al. 2018) and behaviour (Tidau and Briffa  
136 2019; Hastie et al. 2021), and the composition and functionality of microbial  
137 communities (Robinson et al. 2021). Therefore, ecoacoustics could provide important  
138 measurements across the degradation-restoration continuum.

139

## Soil ecoacoustics in forest restoration

140 Despite the potential of ecoacoustics to contribute to forest restoration monitoring, few  
141 studies have deployed this technology to assess above-ground faunal soundscapes  
142 in a forest restoration context (Turner et al. 2018; Vega-Hidalgo et al. 2021). Moreover,  
143 to our knowledge, no studies have applied ecoacoustics to measure or monitor below-  
144 ground biodiversity in a restoration context. This is despite its demonstrable  
145 effectiveness at detecting soil meso- and macrofauna acoustic signals in other  
146 settings, such as agriculture (Maeder et al. 2019), silviculture (Maeder et al. 2022),  
147 and in controlled chambers (Lacoste et al. 2018). Here we apply novel ecoacoustics  
148 devices to measure above- and below-ground biodiversity in a forest restoration  
149 chronosequence (a set of ecological sites that share similar attributes but represent  
150 different times since restoration), using a range of acoustic indices to analyse the  
151 recordings, including the Acoustic Complexity Index (ACI) (Pieretti et al. 2011),  
152 Normalised Difference Soundscape Index (NDSI) (Kasten et al. 2012), and  
153 Bioacoustic Index (BI) (Boelman et al. 2007). As faunal species richness, abundance,  
154 biomass and functional diversity are known to increase with restoration age (Derhé et  
155 al. 2016), we expected acoustic diversity to increase accordingly. Specifically, our  
156 study aimed to test the following hypotheses:

- 157
- 158 (a) Acoustic complexity/diversity will be higher in restored plots (30-50 years since  
159 restoration), compared with degraded plots (0-10 years since clearing without  
160 any active restoration intervention), in both soil and ambient recordings.
  - 161 (b) The high-frequency to low-frequency ratio (an amended version of the  
162 Bioacoustic Index) will be higher in restored plots than in degraded plots. This  
163 would indicate lower noise disturbance in the restored plots, based on the  
assumption that high-frequency sounds are more representative of biophony

164 than low-frequency anthrophony resulting from mechanical noise and ground  
165 vibrations.

166 (c) Soil acoustic diversity will positively correlate with invertebrate abundance and  
167 richness, with higher scores in the restored plots.

168

## 169 **Materials and Methods**

170

171 **Study location:** Greno Woods is a large forest (169 ha) near Sheffield in South  
172 Yorkshire, UK (Fig. 1). The forest comprises several restoration age classes. Due to  
173 comparator site availability constraints, samples were collected from two age classes:  
174 0-10 years since deforestation and no active restoration interventions since (referred  
175 to in this study as 'degraded') representing recent degradation; and 31-50 years since  
176 restoration (referred to in this study as 'restored'). We identified three spatially-  
177 independent replicate plots for sampling each age class (0A, 0B, 0C, and 30A, 30B,  
178 30C; Fig. 1 and Fig. 2A, B). The habitat classification of all restored sampling plots  
179 was semi-natural broadleaved woodland of the W16 National Vegetation Classification  
180 (Rodwell 2006). The degraded plots were dominated by bracken *Pteridium aquilinum*,  
181 with occasional silver birch *Betula pendula* saplings. The restored plots were  
182 dominated by English oak *Quercus robur*, sessile oak *Q. petraea*, silver birch and  
183 rowan *Sorbus aucuparia*, with a well-developed understory of bilberry *Vaccinium*  
*myrtillus*, bramble *Rubus fruticosus* *agg.*, holly *Ilex aquifolium*, and bracken.

184



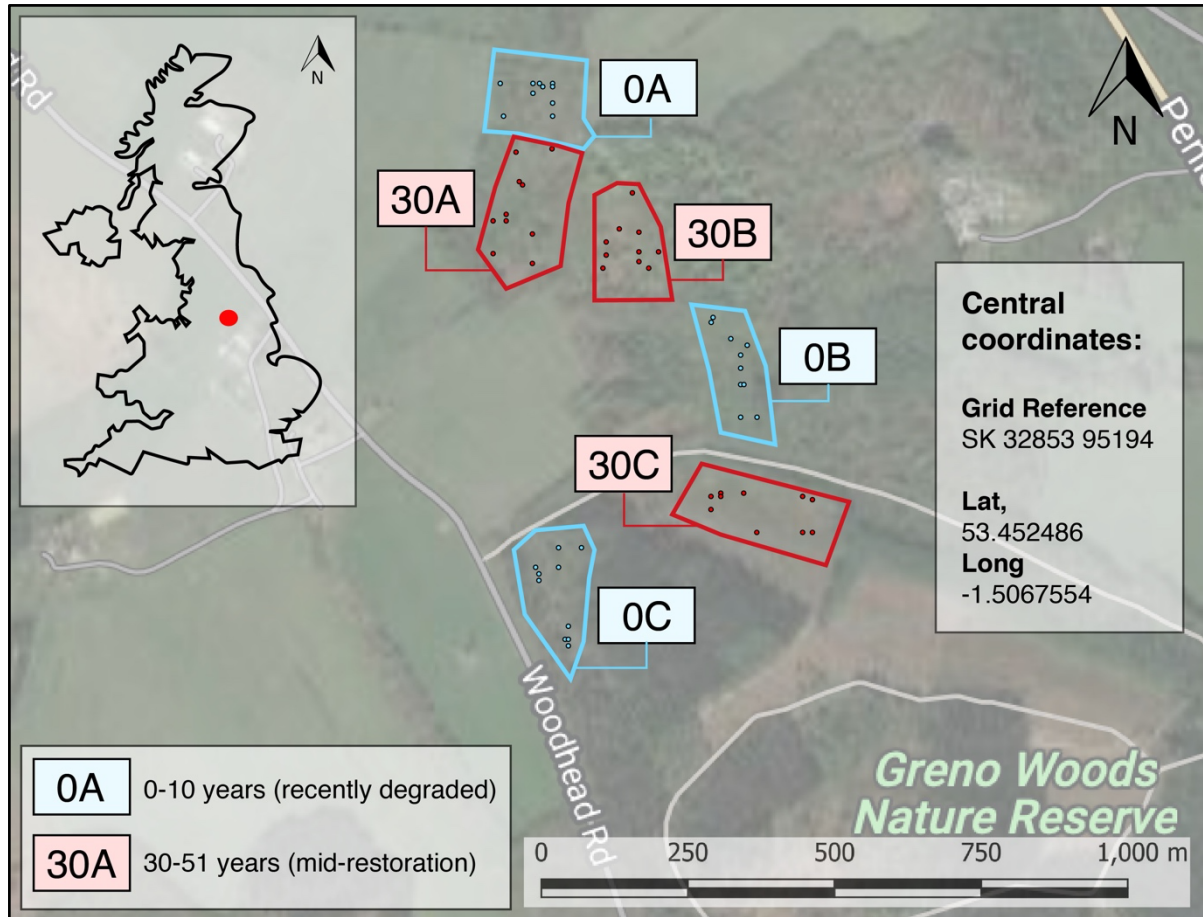

**Figure 1.** Site location (Greno Woods, South Yorkshire, UK), sampling plots within the blue polygons for degraded and red polygons for restored, and the ten randomly selected sampling locations within each plot. The inset shows the study location (red dot) in the broader UK context.

**Soundscape sampling:** We used a relatively inexpensive ecoacoustics sampling device for below-ground sampling: a JrF C-Series Pro contact microphone sensor ([jezrileyfrench.co.uk](http://jezrileyfrench.co.uk)) with a 2 m cable and a 1/4" Neutrik jack. The C-series contact microphones provide a broader frequency response than others, meaning more low-end and mid-frequency range responses. This broader frequency response is optimal for recording below-ground soundscapes (Maeder et al. 2019; Gamal et al. 2020). The JrF microphone was attached to a metal probe and linked to a handheld acoustic

198 recording device (Zoom H4n Pro) prior to inserting the probe into the soil. We recorded  
199 .wav sound files, at 16 bit depth, and with a sampling rate of 48 kHz, which is a similar  
200 rate used in other soil acoustic research (Abrahams 2019), capturing sounds to a  
201 maximum of 24 kHz and therefore covering the entire audible range (Maeder et al.  
202 2022). To record above-ground (ambient) sound—for instance, to detect soniferous  
203 species such as birds—we installed a Tascam DR-100MKII audio recording device  
204 onto a tripod in each plot, using its inbuilt omni-directional microphones to record  
205 sounds with the same file format.

206  
207 We selected below-ground acoustic sampling locations using a geographical  
208 information system (GIS). We created polygon boundary shapefiles around each of  
209 the six spatially-independent sampling plots and generated ten random sampling  
210 points for each plot using the random points algorithm in QGIS (version 3.24.3 'Tisler').  
211 Below-ground sound samples were collected from the predetermined random points  
212 within each plot. We repeated the sampling on three occasions across three months  
213 (June, July, and August) in the summer of 2022 (Table S1).

214  
215 To determine the appropriate sampling duration for below-ground samples, we first  
216 ran a pilot study, testing the potential saturation and decay of acoustic indices using  
217 different sampling durations (20 s, 1 min, 3 mins, and 5 mins). The sampling durations  
218 were randomised and collected over two visits ( $n = 14$  per sampling duration). Each  
219 recording followed a separate probe insertion into the soil to represent the main study  
220 approach. To control for initial geophony (e.g., displaced soil particles) and potential  
221 disturbance to biophony from the physical disturbance of entering the soil, recordings  
222 always followed an initial 30 s resting period. We also controlled for higher frequency

223 anthropony by setting a low-pass filter to 2 kHz during analysis. This testing process  
224 identified a sampling duration of 3 mins as optimal. There was no significant effect of  
225 time post-3 mins (i.e. 3 mins vs. 5 mins) on acoustic complexity ( $t = 1.7-2.1$ ;  $p = 0.48-$   
226  $0.64$ ) (Fig. S1).

227  
228 Following the pilot study, we collected data for the main part of the study. During the  
229 three sampling occasions, we set the Tascam DR-100MKIII to record above-ground  
230 soundscape samples at each plot. We then recorded the 3 mins below-ground  
231 samples ( $n = 10$ ) in each plot, alongside simultaneous control samples of the same  
232 duration. The latter involved recording 'blanks' by leaving a recorder and contact  
233 microphone outside the soil, supported on sound attenuation foam. In total, we  
234 collected  $n = 180$  below-ground samples (3 mins each) with their matching control  
235 recordings, and  $n = 18$  above-ground samples. The above-ground recordings were  
236 post-processed by being divided into 3 mins sections to simultaneously match the  
237 below-ground recordings ( $n = 180$  subsamples).

238  
239 **Sound attenuation chamber:** We used an additional sampling method to record the  
240 soil soundscape in each plot. This involved collecting soil samples with a 3L plastic  
241 container and placing them into a sound-attenuation chamber, allowing us to record a  
242 'snapshot' of the soundscape under controlled conditions (Fig. 2C). We used the same  
243 recording equipment for the *in situ* and sound-attenuation chamber samples. In total,  
244 we collected  $n = 18$  chamber samples (3 mins each). To determine the optimal sound-  
245 attenuation chamber design, we first ran a pilot study using different sound barrier  
246 configurations (Fig. S2). The final design comprised a 60 L plastic chamber, with

247 sound-attenuation foam installed on each internal wall, including the base and lid (Fig.  
248 2C).

249 **Invertebrate counts:** We recorded the abundance and richness of meso- and  
250 macrofauna in the soil by collecting 3 L soil samples from a random point (determined  
251 using a digital number randomiser). We subsequently counted the invertebrates on  
252 the sound-attenuation chamber lid (Fig. 2D) by systematically searching through the  
253 soil, working from left-to-right and carefully displacing soil particles, thereby revealing  
254 the invertebrates (Stroud 2019). The invertebrates were photographed and recorded  
255 in a spreadsheet on-site. The soil and the invertebrates were placed back in their  
256 source location once the counting was completed.

257

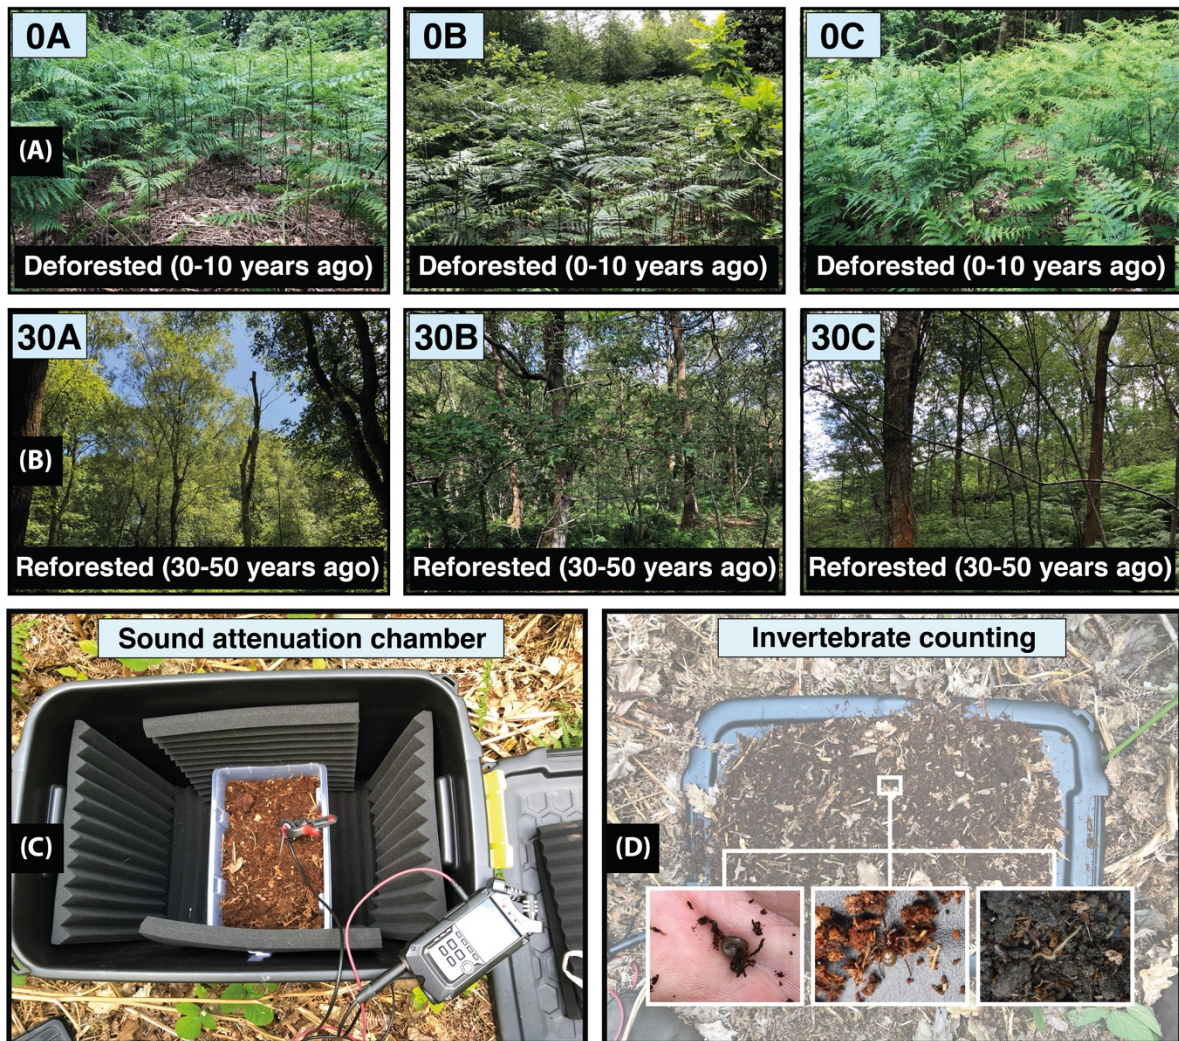

258 **Figure 2.** (A) Degraded study plots. (B) Restored study plots. (C) Sound attenuation  
259 chamber with the Zoom H4n recorder and JrF C-series contact microphone. (D) The  
260 invertebrate counting method.  
261

262 **Data analysis:** To process the sound recordings (.wav files), we used the wildlife  
263 sound analysis software Kaleidoscope Pro (Version 5.4.7; Wildlife Acoustics, 2022).  
264 This software allows for the analysis of full-spectrum recordings to measure  
265 multiple acoustic indices, including the ACI (Pieretti et al. 2011), NDSI (Kasten et al.  
266 2012) and BI (Boelman et al. 2007) selected for this study. We chose two diversity  
267 indices (ACI and BI) and one index to measure the biophony-to-anthropony ratio  
268 (NDSI), allowing us to test our three hypotheses.

269  
270 ACI directly measures the variability in sound intensity in both frequency and time  
271 domains, comparing the normalised absolute difference of amplitude between  
272 adjacent FFT windows in each frequency bin over a period of K seconds. First, it  
273 computes the absolute difference between adjacent values of intensity:

274 
$$d_k = I_k - I_{(k+1)}$$

275 The changes in the recording's temporal step are encompassed by the summation of  
276 the  $d_k$ :

277 
$$D = \sum_{k=1}^n d_k$$

278 To obtain the relative intensity and reduce the influence of the distance between the  
279 microphone and biophony source, the result  $D$  is divided by the total sum of the  
280 intensity values (Maeder et al. 2022):

281

$$ACI = \frac{D}{\sum_{k=1}^n I_k}$$

282 The total ACI is the sum of the ACIs across bins for each period K in the recording.

283

284 BI is computed as “the area under each curve including all frequency bands associated  
285 with the dB value that was greater than the minimum dB value for each curve. The  
286 area values are thus a function of both the sound level and the number of frequency  
287 bands” (Boelman et al. 2007).

288

289 NDSI is computed as follows:

290

$$NDSI = \frac{(\beta - \alpha)}{(\beta + \alpha)}$$

291 Where  $\beta$  and  $\alpha$  are the total estimated power spectral density for the largest 1 kHz  
292 biophony bin and the anthrophony bin, respectively. The NDSI is a ratio in the range  
293 [- 1 to + 1], where + 1 indicates a signal containing only high-frequency biophony and  
294 no low-frequency anthrophony (Kasten et al. 2012).

295

296 Standard settings in Kaleidoscope Pro were used for the calculation of above-ground  
297 acoustic indices. However, as sounds above 2 kHz do not propagate well through the  
298 soil (Maeder et al. 2022), for the below-ground acoustic indices, we set a maximum  
299 frequency of 2 kHz, and a lower threshold of 500 Hz for biophony in NDSI and BI.

300

301 Standard settings in Kaleidoscope Pro were used for the calculation of above-ground  
302 acoustic indices. However, as sounds above 2 kHz do not propagate well through the

303 soil (Maeder et al. 2022), for the below-ground acoustic indices, we set a maximum  
304 frequency of 2 kHz, and a lower threshold of 500 Hz for biophony in NDSI and BI.

305

306 All statistical analysis was conducted in R Version 2022.02.2 'Prairie Trillium' (R Core  
307 Team 2022) with supplementary software (e.g., Microsoft Excel for .csv file  
308 processing). To test for the effect of restoration on acoustic index values, we applied  
309 the two-samples t-test using the rstatix package (Kassambara 2022). We also fit linear  
310 mixed effects models (LMM) to the data using R and its lme4 package (Bates et al.  
311 2015), with separate models fitted for different plots and visits. LMMs included random  
312 effects (plots and visits), which are essential to account for the spatial and temporal  
313 correlation between the plots and visits in our experimental design. Acoustic index  
314 outputs were included as response variables, and the degraded vs. restored plots  
315 were included as fixed effects (predictor variables). Tests of significance were  
316 conducted using Satterthwaite's degrees of freedom t-test, which is a function of the  
317 LmerTest package in R (Kuznetsova 2020). Soil invertebrate beta diversity was  
318 visualised using nonmetric multidimensional scaling (NMDS) ordination of Bray–Curtis  
319 distances using the Vegan package in R (Oksanen et al. 2022). The ordination plots  
320 show low-dimensional ordination space in which similar samples are plotted close  
321 together, and dissimilar samples are plotted far apart. We used the analysis of  
322 similarities (ANOSIM) approach to test for compositional differences between  
323 treatment groups. Data visualisations were produced using a combination of R and  
324 the Adobe Illustrator creative cloud 2021 version (Adobe 2021).

325

## 326 **Results**

### 327 ***Soil invertebrate observational surveys***

328 *Restored/degraded soil invertebrate abundance and richness*

329 Restored soils had higher invertebrate abundance (t-test:  $t = -2.2$ ,  $df = 8$ ,  $p = 0.02$ ),  
330 and there was no significant effect of restoration/degradation status on invertebrate  
331 richness ( $t = 0$ ,  $df = 8$ ,  $p = 1$ ).

332

333 *Beta diversity*

334 Soil invertebrate community composition was significantly different between degraded  
335 and restored plots (stress 0.01,  $R: 0.55$ ,  $p = 0.05$ , permutations = 999) (Fig. 6).  
336 Earthworms (sub-order: Lumbricina) were the dominant invertebrate in the soil for both  
337 treatment groups ( $n = 13$  from  $n = 64$  for degraded vs  $n = 32$  from  $n = 102$  for restored  
338 plots) (Fig. 3 and 4), and were more abundant in the restored plots (degraded  $\bar{x} = 1.4$ ;  
339 restored  $\bar{x} = 3.5$ ;  $t = -2.9$ ,  $df = 8$ ,  $p = 0.01$ ) (Fig. 3 and 4).

340

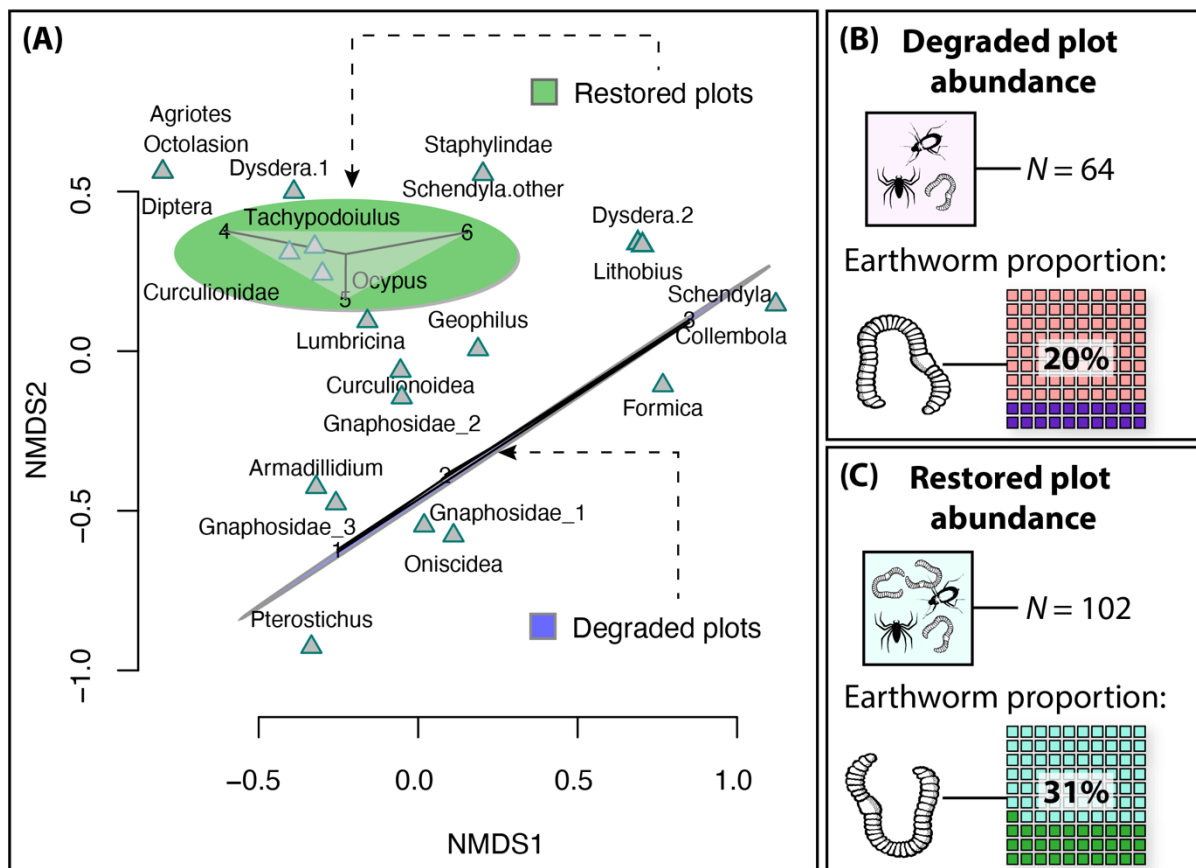

341



Soil ecoacoustics in forest restoration

342 **Figure 3.** (A) Nonmetric multidimensional scaling (NMDS) ordination plots for  
 343 visualising soil invertebrate beta diversity (community composition) for all plots  
 344 (Stress: 0.01; Bray dissimilarity). Ellipses represent the standard error of the  
 345 (weighted) average of scores. Clusters suggest clear differences between  
 346 communities of the different treatment groups, as indicated by the colour purple ellipse  
 347 for degraded plots (the linear ellipse) and green ellipse for restored plots. (B)  
 348 Abundance of invertebrates counted in degraded plots and the proportion of  
 349 earthworms. (C) Abundance of invertebrates counted in restored plots and the  
 350 proportion of earthworms.

351

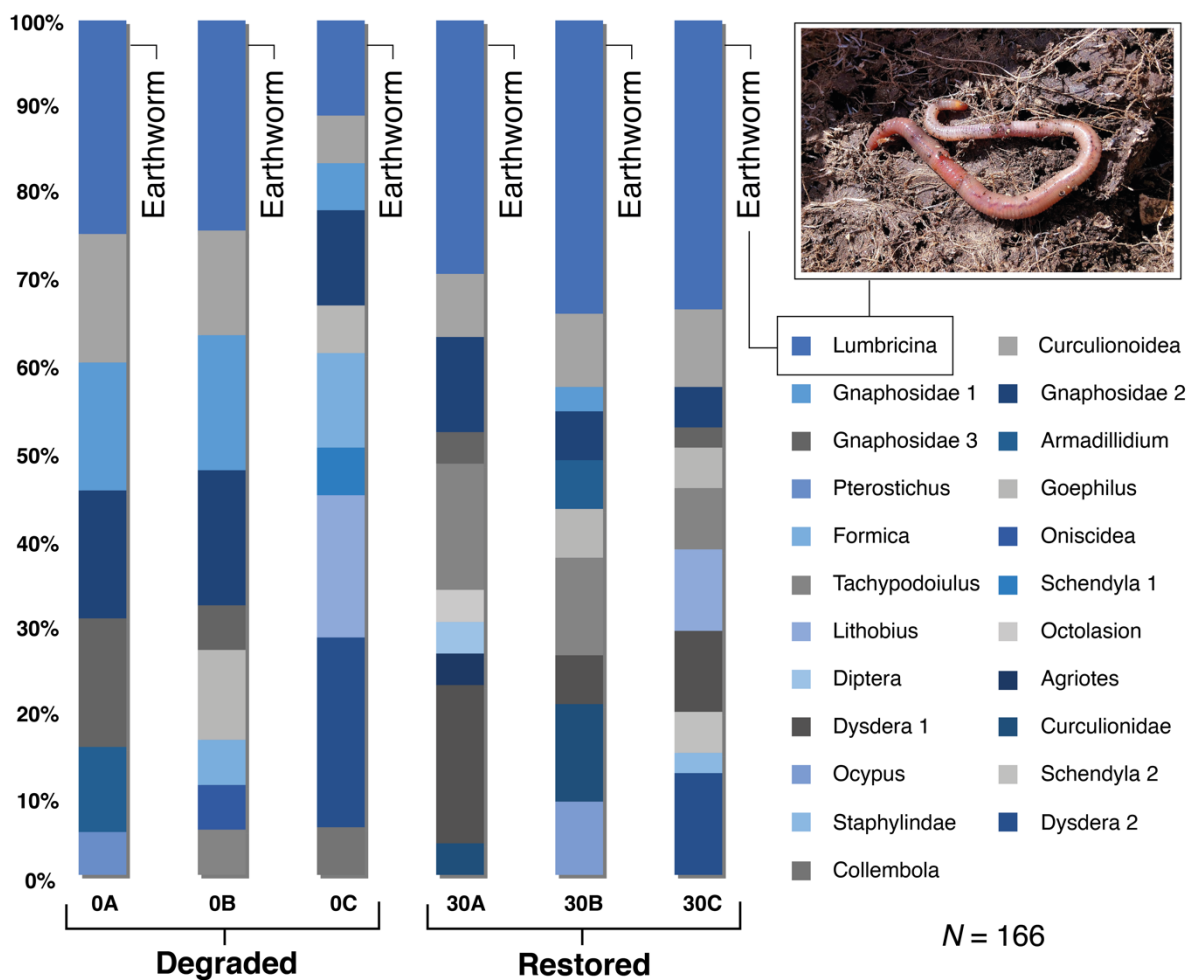

352

353 **Figure 4.** Stacked bar chart showing the relative abundance of soil invertebrates  
354 between plots (individual bars) and treatment groups (degraded vs restored). The top  
355 blue segment denotes earthworms (inset: earthworm), indicating a higher relative and  
356 absolute abundance of earthworms ( $n = 13$  for degraded vs  $n = 32$  for restored plots)  
357 in the samples from the restored forest plots.

358

#### 359 *Correlation of ecoacoustics variables and invertebrate abundance and richness*

360 The ACI correlated with invertebrate abundance, with higher scores in the restored  
361 plots (Estimate = 0.2,  $R^2 = 0.36$ , SE = 0.07,  $p = 0.01$ ). A significant effect also occurred  
362 when changing ACI for BI (Estimate = 0.9,  $R^2 = 0.31$ , SE = 0.03,  $p = 0.02$ ). This  
363 suggests that restoration status and acoustic complexity and diversity metrics can  
364 predict invertebrate abundance. However, there was no significant effect of  
365 restoration/degradation or invertebrate richness on acoustic complexity based on the  
366 ACI (Estimate = -0.16, SE = 0.25,  $p = 0.5$ ). This was also the case for acoustic diversity  
367 measured using the BI (Estimate = -1.63, SE = 1.18,  $p = 0.18$ ). This corroborates the  
368 t-test for differences in means between invertebrate richness in the degraded vs  
369 restored plots ( $t = 0$ ,  $df = 8$ ,  $p = 1$ ).

370

#### 371 ***Soil ecoacoustics in sound attenuation chamber***

372 There was significantly greater ACI (Estimate = 1.6,  $R^2 = 0.56$ , SE = 0.3,  $p = <0.01$ )  
373 (Fig. 5A) and BI (Estimate = 7.95,  $R^2 = 0.58$ , SE = 1.8,  $p = <0.01$ ) in restored compared  
374 with degraded soils, indicating bioacoustic complexity and diversity was higher in the  
375 restored plot soils in the sound attenuation chambers. However, there was no effect  
376 of restoration/degradation status on NDSI, indicating similar high-frequency to low-

Soil ecoacoustics in forest restoration

377 frequency ratios in the sound attenuation chamber for restored and degraded soils

378 (Estimate = 0.04, SE = 0.13,  $p = 0.7$ ) ( $t = -0.33$ ,  $df = 8$ ,  $p = 0.37$ ) (Fig. 5A3).

379

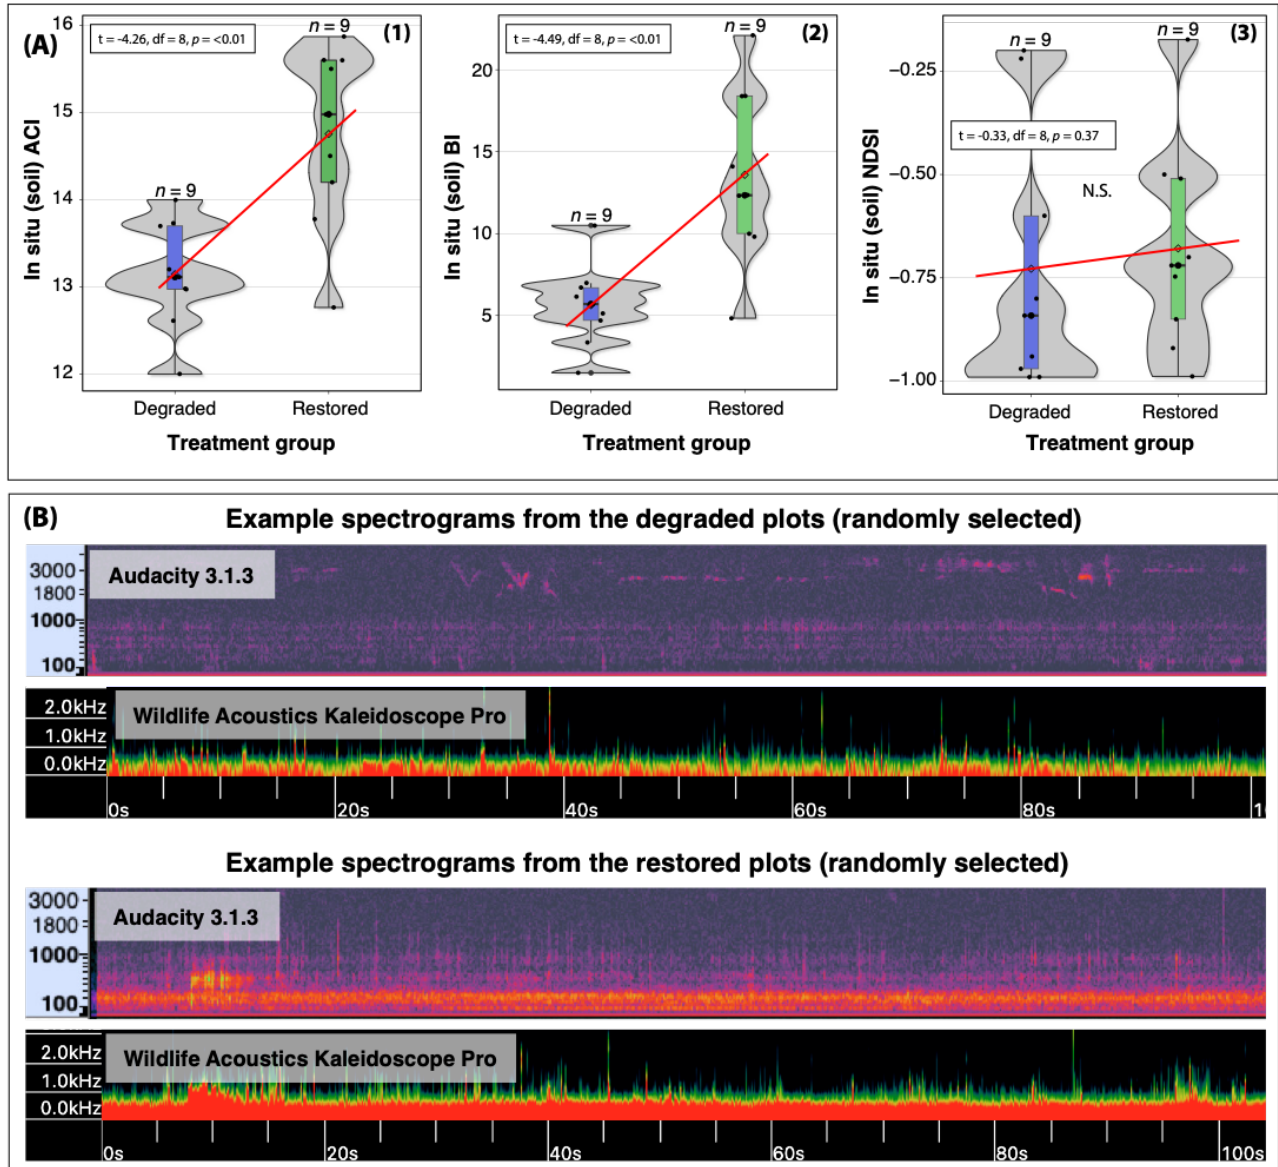

380

381 **Figure 5.** (A) Boxplots of acoustic index outputs for sound attenuation chamber (i.e.,

382 soil) samples and separated based on treatment groups (degraded vs restored). From

383 left to right: (1) ACI, (2) BI, and (3) NDSI. Each plot has a red guideline to show trends

384 in the mean values. (B) Examples of soil acoustic spectrogram for both treatment

385 groups, showing the same window in two different analysis programmes (Wildlife

386 Acoustics Kaleidoscope Pro and Audacity v3.1.3). N.S. = not significant.

387 ***In situ* soil ecoacoustics**

388 There was no effect of the restoration/degradation status on ACI (Estimate = 0.12, SE  
389 = 0.14,  $p = 0.3$ ) or BI (Estimate = 0.25, SE = 0.5,  $p = 0.6$ ; Fig. 6). There was a greater  
390 NDSI in restored *in situ* soils than degraded soils (Estimate = 0.09,  $R^2 = 0.15$ , SE =  
391 0.03,  $p = 0.02$ ) ( $t = -2.18$ ,  $df = 89$ ,  $p = 0.01$ ) (Fig. 6, final plot), indicating greater high-  
392 frequency to low-frequency ratio in the restored soils.

393

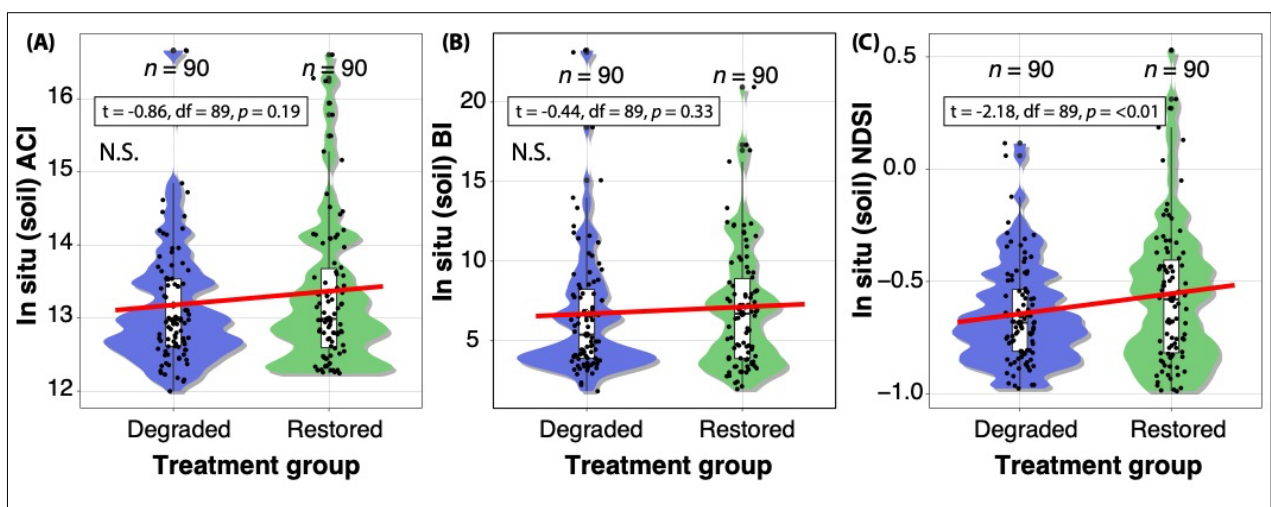

394

395 **Figure 6.** Boxplots of acoustic index outputs for *in situ* (i.e., soil) samples, separated  
396 by treatment group (degraded vs restored). From left to right: (A) ACI, (B) BI, and (C)  
397 NDSI. Each plot has a red guideline to show trends in the mean values. N.S. = not  
398 significant.

399

400 ***Above-ground acoustic diversity and complexity***

401 There was no effect of restoration/degradation status on ambient ACI (Estimate = -  
402 0.5, SE = 0.6,  $p = 0.4$ ) and BI (Estimate = 0.7, SE = 2.0,  $p = 0.7$ ) (Fig. 7). When  
403 accounting for the visit and plot random effects, there was no effect of  
404 restoration/degradation status on ambient NDSI (Estimate = 0.14, SE = 0.2,  $p = 0.6$ ).

405 However, we do report a higher NDSI in the restored plots when we did a simple linear  
406 regression (Estimate = 0.18,  $R^2 = 0.46$ ,  $df = 168$ ,  $p = 0.04$ ).

407

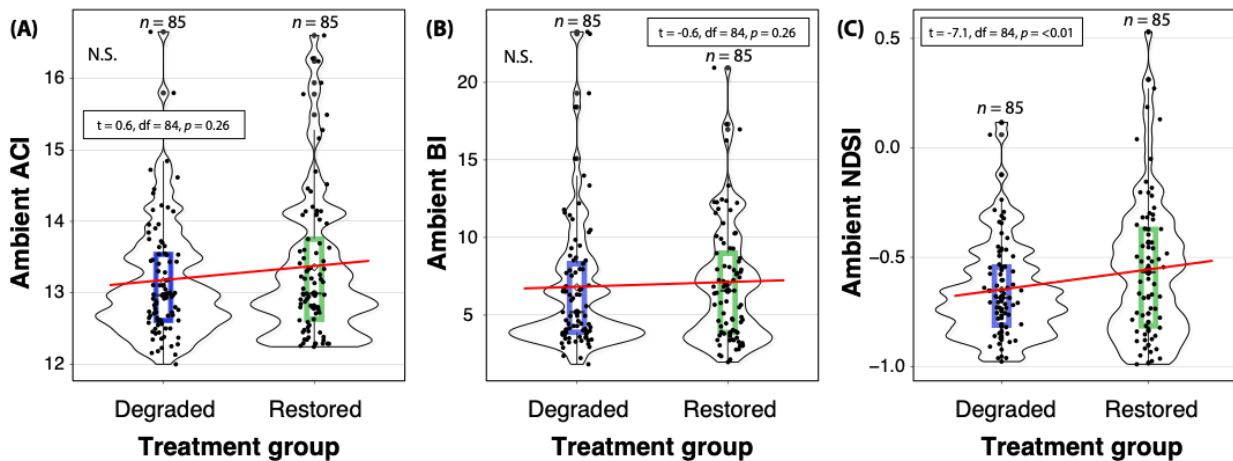

408

409 **Figure 7.** Boxplots of acoustic index outputs for ambient (i.e., above-ground) samples,  
410 separated by treatment group (degraded vs restored). From left to right: (A) ACI, (B)  
411 BI, and (C) NDSI. Each plot has a red guideline to show trends in the mean values.

412 N.S. = not significant.

413

## 414 Discussion

415 We show that restored forest soils – in sound attenuation chambers at least – exhibit  
416 higher acoustic complexity and diversity than degraded soils, supporting our first  
417 hypothesis. Interestingly, there was no significant relationship between ambient (i.e.,  
418 above-ground) acoustic diversity and degraded/restored status, probably in part due  
419 to the broad scale of sound transmission through the forest, compared to the highly  
420 localised soil soundscape (discussed below). We report greater high-frequency to low-  
421 frequency ratios in restored compared with degraded forest soils measured *in situ*,  
422 supporting our second hypothesis. Moreover, we validate our findings by reporting that  
423 invertebrate abundance – though not richness – was higher in restored than degraded

424 forest soils. Accordingly, our study provides a case study on how soil ecoacoustics  
425 has clear potential to assess biodiversity in – and the restoration status of – forest  
426 soils.

427

#### 428 ***Restored vs. degraded soil ecoacoustics***

429 Responses of soil biota to microhabitat conditions have been investigated extensively  
430 (Martins et al. 2012; Heiniger et al. 2015), and a recent study explored the temporal  
431 and spatial dynamics of soil biophony using ecoacoustics (Maeder et al. 2022).  
432 However, to our knowledge, our study is the first to investigate soil acoustic dynamics  
433 in a restoration context. It is the first study to relate the acoustic complexity, amplitude  
434 and frequency-band characteristics of the soil soundscape (via the ACI, BI and NDSI)  
435 to the abundance and richness of directly measured forest soil invertebrates. We  
436 reveal significant differences in the acoustic complexity and diversity between  
437 degraded and restored forest plots when measured in a sound attenuation chamber.  
438 These differences were associated with soil invertebrate abundance but not richness  
439 (unlike the findings of Maeder et al. 2022). This relationship between acoustic signals  
440 and soil communities, and the variation between degraded and restored plots,  
441 suggests that the restoration status of forest soils can be captured by monitoring soil  
442 soundscapes. Our models show that we could predict acoustic complexity and  
443 diversity based on the degraded and/or restored status of the forest plots, and these  
444 relationships were still significant when accounting for plot and visit-associated  
445 variability. The Acoustic Complexity Index (ACI) was the only one of the three indices  
446 we used that assesses the temporal dynamics of the sound recordings. It has become  
447 clear during this study that soil recordings are characterised by broadband stop-start  
448 intermittent noises produced by soil fauna, and these dynamics are better represented

## Soil ecoacoustics in forest restoration

449 in the time domain than by analysing patterns across frequency bins (as done with BI  
450 and NDSI). Therefore, ACI is the best index to analyse this characteristic.

451

452 However, our results contrasted somewhat between samples from the sound  
453 attenuation chamber and taken *in situ*. The reason for this could be that the chamber  
454 may enhance the quality of the acoustic signal and reduce external noise. Despite the  
455 resting period, the act of moving soil into the chamber could also stimulate the  
456 movement (and hence sound production) of soil fauna, although acoustic complexity  
457 and diversity were still significantly higher in the restored soils. These findings suggest  
458 that the sound attenuation chamber sampling approach may be more suitable for  
459 detecting soil fauna acoustic signals in this forest restoration context. However, the *in*  
460 *situ* approach has the benefit of being less intrusive (i.e., no soil excavation is  
461 required). Therefore, it will be important to further optimise the *in situ* sampling strategy  
462 to improve the application of ecoacoustics to restoration.

463

464 The lack of association between soil invertebrate *richness* and acoustic index outputs  
465 contradicts the relationships found in a recent soil acoustics study (Maeder et al.  
466 2022). This could simply be due to inter-ecosystem variability and the variety of  
467 acoustic signals made by soil fauna, which is still poorly understood. Alternatively, it  
468 could result from the relatively rapid *in situ* invertebrate-counting method employed in  
469 this study, which only provided a 'snapshot' of the resident soil fauna. Mean  
470 invertebrate richness was the same for both degraded and restored forest plots,  
471 although the invertebrate abundance was significantly higher in the restored plots.  
472 This aligns with other studies that show higher soil invertebrate abundance in habitats  
473 with lower disturbance (Smith et al. 2008; Nkem et al. 2020). The higher abundance

## Soil ecoacoustics in forest restoration

474 of earthworms in the restored soils also corroborates other studies (Wodika et al. 2014;  
475 Singh et al. 2020). This could partially explain the higher acoustic complexity detected  
476 in restored soils. For instance, earthworms form burrows through the soil as they seek  
477 carbon-rich areas, which serve as preferential networking pathways for plant root  
478 growth, water flow and gas transport (Lacoste et al. 2018), all of which contribute to  
479 the soil soundscape (Gagliano et al. 2017; Del Stabile et al. 2022; Keen et al. 2022).  
480 In the future, it would be prudent to take a more robust approach to invertebrate  
481 counting, such as using the Berlese method (Sabu and Shiju 2010). This involves  
482 specially-adapted funnels to separate soil invertebrates from litter and particles and  
483 counting *ex situ* (Maeder et al. 2022). Metagenomics analysis is another option, either  
484 alone or in combination with traditional methods. This allows the genomes of soil  
485 organisms to be sequenced, differentiated and labelled without requiring  
486 morphological analysis (Schmidt et al. 2022). However, the need to control false-  
487 positive occurrences resulting from legacy DNA is vital (Laroche et al. 2017).

488

489 We report a significant association between NDSI values and the  
490 degradation/restoration status of forest plots, where restored plots exhibited a greater  
491 high-frequency to low-frequency ratio, aligning with our hypothesis. The NDSI seeks  
492 to describe the 'health' of an ecosystem by inferring the level of anthropogenic  
493 disturbance received (Eldridge et al. 2016). We hypothesised that our recording  
494 devices were more likely to detect higher-frequency biophony in restored plots and  
495 lower-frequency anthropogenic disturbance in degraded plots. This was based on the  
496 assumption that the increased signals from biological activity in restored plots would  
497 outweigh low-frequency noise, with potential effects also from the attenuation  
498 properties of the system (Tashakor and Chamani 2021; Sangermano 2022) i.e., the



## Soil ecoacoustics in forest restoration

499 energy loss of sound propagation in a given medium. It could also be that greater  
500 earthworm activity changes soil characteristics (making them more air permeable) to  
501 allow better propagation of higher-frequency sounds, thereby increasing NDSI scores  
502 (Keen et al. 2022). Understanding the factors that affect this biophony-to-anthrophony  
503 ratio in a restoration context warrants further research. Examples of next steps could  
504 be conducting controlled experiments that manipulate sound sources and  
505 adding/removing vegetation and other physical features and media that provide noise  
506 attenuation. Applying new physics-based models to evaluate how the frequency and  
507 distance-dependent attenuation of sound impact the acoustic detection of soniferous  
508 species (Hauptert et al. 2022) could also improve outcomes in a restoration monitoring  
509 context. Interestingly, there was no significant difference in the NDSI values between  
510 degraded and restored soil in the sound chambers, which was probably because the  
511 sound attenuation foam in the chamber acts to standardise ambient acoustic  
512 conditions.

513

### 514 ***Above-ground ecoacoustics***

515 Contrary to our expectations, we did not find a significant relationship between above-  
516 ground acoustic diversity and complexity and the degradation/restoration status of the  
517 forest plots. We hypothesised that we would observe higher acoustic diversity in the  
518 restored forest plots as faunal species richness, abundance, biomass and functional  
519 diversity are known to increase with restoration age (Derhé et al. 2016). Moreover,  
520 studies have shown that bird species diversity (the most soniferous group contributing  
521 to the soundscape) increases as restored forests mature, and bird communities in  
522 recovering areas become more similar to those of undisturbed areas with post-  
523 restoration age (Owen et al. 2021). The lack of a restoration effect on above-ground

## Soil ecoacoustics in forest restoration

524 acoustic diversity and complexity could be due to our degraded and restored plots  
525 being relatively small compared to the soundscape of birdsong. Consequently,  
526 birdsong acoustic signals could potentially overlap across our plots, which is a  
527 limitation of our study. Future studies should pair sampling in time across plots,  
528 particularly when degraded and restored plots are within relatively close proximity to  
529 each other. Alternatively, mean acoustic diversity might increase as patch size  
530 increases, and more complex vegetation is associated with higher diversity (Grant et  
531 al. 2016). Therefore, it is possible that the minimum habitat patch size in our study was  
532 not sufficient to influence acoustic source variability in the treatment groups.

533

534 Our study provides preliminary evidence for using soil ecoacoustics – a minimally-  
535 intrusive and cost-effective assessment method – as a soil biota monitoring tool that  
536 can evaluate restoration projects. With future work, soil ecoacoustics could develop  
537 into an effective tool that measures the abundance, complexity and composition of soil  
538 biota that is also sensitive to restoration interventions. Given the rapid pace of  
539 biodiversity loss and the rise in anthropogenic noise, the ability to detect the acoustic  
540 signals from soniferous species and monitor the level of disturbance from  
541 anthrophonies has never been more important. Further exploration of above-ground  
542 ecoacoustics in different forest restoration settings, e.g., sites receiving different  
543 restoration interventions of varying patch sizes and in different biomes, would be  
544 valuable. Building on our findings—that soil acoustic complexity and diversity and  
545 noise disturbance differ between degraded and restored forest plots—has the  
546 potential to inform and enhance future restoration policy and practice.

547

548 **Literature Cited**

549 Abrahams C (2019) Comparison between lek counts and bioacoustic recording for  
550 monitoring Western Capercaillie (*Tetrao urogallus* L.). *Journal of Ornithology*, 160:  
551 685-697

552

553 Abrahams C, Geary M (2020) Combining bioacoustics and occupancy modelling for  
554 improved monitoring of rare breeding bird populations. *Ecological Indicators*, 112:  
555 106131.

556

557 Abrahams C, Desjonquères C, Greenhalgh J (2021) Pond Acoustic Sampling  
558 Scheme: A draft protocol for rapid acoustic data collection in small  
559 waterbodies. *Ecology and Evolution*, 11:7532-7543

560

561 Adobe (2021) *Adobe Illustrator*. [https://helpx.adobe.com/illustrator/using/whats-](https://helpx.adobe.com/illustrator/using/whats-new.html)  
562 [new.html](https://helpx.adobe.com/illustrator/using/whats-new.html) (accessed 13 November 2022)

563

564 Bates D, Mächler M, Bolker B, Walker S (2015) Fitting Linear Mixed-Effects Models  
565 Using lme. *Journal of Statistical Software*. 67: 1-48.

566

567 Boelman NT, Asner GP, Hart PJ, Martin RE (2007) Multi-trophic invasion resistance  
568 in Hawaii: bioacoustics, field surveys, and airborne remote sensing. *Ecological*  
569 *Applications* 17:2137-2144.

570

Soil ecoacoustics in forest restoration

571 Breed MF, Harrison PA, Blyth C, Byrne M, Gaget V, Gellie NJ, Groom SV, Hodgson  
572 R, Mills JG, Prowse TA, Steane DA (2019) The potential of genomics for restoring  
573 ecosystems and biodiversity. *Nature Reviews Genetics*, 20:615-628.

574

575 Camarretta N, Harrison PA, Bailey T, Potts B, Lucieer A, Davidson N, Hunt M (2020)  
576 Monitoring forest structure to guide adaptive management of forest restoration: a  
577 review of remote sensing approaches. *New Forests*, 51:573-596.

578

579 de Almeida DR, Stark SC, Valbuena R, Broadbent EN, Silva TS, de Resende AF,  
580 Ferreira MP, Cardil A, Silva CA, Amazonas N, Zambrano AM (2020) A new era in  
581 forest restoration monitoring. *Restoration Ecology*, 28:8-11.

582

583 de Framond L, Brumm H (2022) Long-term effects of noise pollution on the avian dawn  
584 chorus: a natural experiment facilitated by the closure of an international  
585 airport. *Proceedings of the Royal Society B*, 289:20220906.

586

587 De Jong K, Amorim MCP, Fonseca PJ, Fox CJ, Heubel KU (2018) Noise can affect  
588 acoustic communication and subsequent spawning success in fish. *Environmental*  
589 *Pollution*, 237:814-823.

590

591 De Vos JM, Joppa LN, Gittleman JL, Stephens PR, Pimm SL (2015) Estimating the  
592 normal background rate of species extinction. *Conservation Biology*, 29:452-462.

593

594 Del Stabile F, Marsili V, Forti L, Arru L (2022) Is There a Role for Sound in  
595 Plants?. *Plants*, 11:2391.

596

597 Derhé MA, Murphy H, Monteith G, Menéndez R (2016) Measuring the success of  
598 reforestation for restoring biodiversity and ecosystem functioning. *Journal of Applied*  
599 *Ecology*, 53:1714-1724.

600

601 Eldridge A, Casey M, Moscoso P Peck M (2016) A new method for ecoacoustics?  
602 Toward the extraction and evaluation of ecologically-meaningful soundscape  
603 components using sparse coding methods. *PeerJ*, 4:e2108.

604

605 Eldridge A, Guyot P, Moscoso P, Johnston A, Eyre-Walker Y, Peck M (2018) Sounding  
606 out ecoacoustic metrics: Avian species richness is predicted by acoustic indices in  
607 temperate but not tropical habitats. *Ecological Indicators*, 95:939-952.

608

609 Gamal MA, Khalil MH, Maher G (2020) Monitoring and Studying Audible Sounds  
610 Inside Different Types of Soil and Great Expectations for its Future Applications. *Pure*  
611 *Applied Geophysics*, 177:5397-5416.

612

613 Gan H, Zhang J, Towsey M, Truskinger A, Stark D, van Rensburg BJ, Li Y, Roe P  
614 (2020) Data selection in frog chorusing recognition with acoustic indices. *Ecological*  
615 *Information*, 60:101160.

616

617 Gagliano M, Grimonprez M, Depczynski M, Renton M (2017) Tuned in: plant roots use  
618 sound to locate water. *Oecologia*, 184:151-160.

619

Soil ecoacoustics in forest restoration

620 Glatthorn J, Annighöfer P, Balkenhol N, Leuschner C, Polle A, Scheu S, Schuldt A,  
621 Schuldt B, Ammer C (2021) An interdisciplinary framework to describe and evaluate  
622 the functioning of forest ecosystems. *Basic Applied Ecology*, 52:1-14.

623

624 Golar G, Muis H, Akhbar A, Khaeruddin C (2022) Threat of Forest Degradation in Ex-  
625 Forest Concession Right (HPH) in Indonesia. *Sustain Climate Change*, 15:216-223.

626

627 Gollan JR, de Bruyn LL, Reid N, Wilkie L (2013) Monitoring the ecosystem service  
628 provided by dung beetles offers benefits over commonly used biodiversity metrics and  
629 a traditional trapping method. *Journal of Nature Conservation*, 21:183-188.

630

631 Grant BB, Samways MJ (2016) Use of ecoacoustics to determine biodiversity patterns  
632 across ecological gradients. *Conservation Biology*, 30:1320-1329.

633

634 Guidi C, Bou-Cabo M, Lara G, KM3NeT Collaboration (2021) Passive acoustic  
635 monitoring of cetaceans with KM3NeT acoustic receivers. *Journal of*  
636 *Instruments*, 16:C10004.

637

638 Hansen AJ, Noble BP, Veneros J, East A, Goetz SJ, Supples C, Watson JE, Jantz  
639 PA, Pillay R, Jetz W, Ferrier S (2021) Toward monitoring forest ecosystem integrity  
640 within the post-2020 Global Biodiversity Framework. *Conservation*  
641 *Letters*, 14:e12822.

642

643 Harvey DJ, Hawes CJ, Gange AC, Finch P, Chesmore D, Farr IAN (2011)  
644 Development of non-invasive monitoring methods for larvae and adults of the stag  
645 beetle, *Lucanus cervus*. *Insect Conservation Diversity*, 4:4-14.

646

647 Hastie GD, Lepper P, McKnight JC, Milne R, Russell DJ, Thompson D (2021) Acoustic  
648 risk balancing by marine mammals: anthropogenic noise can influence the foraging  
649 decisions by seals. *Journal of Applied Ecology*, 58:1854-1863.

650

651 Hauptert S, Sèbe F, Sueur J (2022) Physics-based model to predict the acoustic  
652 detection distance of terrestrial autonomous recording units over the diel cycle and  
653 across seasons: Insights from an Alpine and a Neotropical forest. *Methods in Ecology  
654 Evolution*.

655

656 Heiniger C, Barot S, Ponge JF, Salmon S, Meriguet J, Carmignac D, Suillerot M Dubs  
657 F (2015) Collembolan preferences for soil and microclimate in forest and pasture  
658 communities. *Soil Biology and Biochemistry*, 86:181-192.

659

660 Hintze F, Machado RB, Bernard E (2021) Bioacoustics for in situ validation of species  
661 distribution modelling: An example with bats in Brazil. *PLOS ONE*, 16:e0248797.

662

663 Jones B, Zapetis M, Samuelson MM, Ridgway S (2020) Sounds produced by  
664 bottlenose dolphins (*Tursiops*): A review of the defining characteristics and acoustic  
665 criteria of the dolphin vocal repertoire. *Bioacoustics*, 29:399-440.

666

667 Kassambara A. (2022) *Rstatis* package. [https://cran.r-](https://cran.r-project.org/web/packages/rstatis/index.html)  
668 [project.org/web/packages/rstatis/index.html](https://cran.r-project.org/web/packages/rstatis/index.html) (accessed 10th November 2022).

669

Soil ecoacoustics in forest restoration

670 Kasten P, Stuart HG, Jordan F, and Wooyeong J (2012) The Remote Environmental  
671 Assessment Laboratory's Acoustic Library: An Archive for Studying Soundscape  
672 Ecology. *Ecological Information* 12:50-67.

673

674 Keen SC, Wackett AA, Willenbring JK, Yoo K, Jonsson H, Clow T, Klaminder J (2022)  
675 Non-native species change the tune of tundra soils: Novel access to soundscapes of  
676 the Arctic earthworm invasion. *Science of the Total Environment*, 838:155976.

677

678 Kleist NJ, Guralnick RP, Cruz A, Lowry CA Francis CD (2018) Chronic anthropogenic  
679 noise disrupts glucocorticoid signaling and has multiple effects on fitness in an avian  
680 community. *Proceedings of the National Academy of Sciences*, 115:E648-E657.

681

682 Kimmins JP (2004) Forest ecology. *Fishes and forestry: Worldwide watershed  
683 interactions and management*, 17-43.

684

685 Kissling WD, Ahumada JA, Bowser A, Fernandez M, Fernández N, García EA,  
686 Guralnick RP, Isaac NJ, Kelling S, Los W, McRae L (2018) Building essential  
687 biodiversity variables (EBVs) of species distribution and abundance at a global  
688 scale. *Biological Reviews*, 93:600-625.

689

690 Kühn S, Utne-Palm AC de Jong K (2022) Two of the most common crustacean  
691 zooplankton *Meganyctiphanes norvegica* and *Calanus* spp. produce sounds within the  
692 hearing range of their fish predators. *Bioacoustics*, 1-17.

693



Soil ecoacoustics in forest restoration

- 694 Kuznetsova A (2020) *The lmerTest package in R*. [https://cran.r-](https://cran.r-project.org/web/packages/lmerTest/index.html)  
695 [project.org/web/packages/lmerTest/index.html](https://cran.r-project.org/web/packages/lmerTest/index.html) (accessed on 10th November 2022).  
696
- 697 Lacoste M, Ruiz S Or D (2018) Listening to earthworms burrowing and roots growing-  
698 acoustic signatures of soil biological activity. *Science Reports*, 8:1-9.  
699
- 700 Laroche O, Wood SA, Tremblay LA, Lear G, Ellis JI Pochon X (2017) Metabarcoding  
701 monitoring analysis: the pros and cons of using co-extracted environmental DNA and  
702 RNA data to assess offshore oil production impacts on benthic  
703 communities. *PeerJ*, 5:e3347.  
704
- 705 Le Bayon RC, Bullinger G, Schomburg A, Turberg P, Brunner P, Schlaepfer R, Guenat  
706 C (2021) Earthworms, plants, and soils. *Hydrogeol, Chem Weather, Soil Form*, 81-  
707 103.  
708
- 709 Li RQ, Dong M, Cui JY, Zhang LL, Cui QG, He WM (2007) Quantification of the impact  
710 of land-use changes on ecosystem services: a case study in Pingbian County,  
711 China. *Environmental Monitoring Assessment*, 128:03-510.  
712
- 713 López-Baucells A, Yoh N, Rocha R, Bobrowiec PE, Palmeirim JM, Meyer CF (2021)  
714 Optimizing bat bioacoustic surveys in human-modified Neotropical  
715 landscapes. *Ecological Applications*, 31:e02366.  
716
- 717 Maeder M, Gossner MM, Keller A, Neukom M (2019) Sounding soil: An acoustic,  
718 ecological artistic investigation of soil life. *Soundscape J*, 18:005-014.

719

720 Maeder M, Guo X, Neff F, Schneider Mathis D, Gossner MM (2022). Temporal and  
721 spatial dynamics in soil acoustics and their relation to soil animal diversity. *PLOS*  
722 *ONE*, 17:e0263618.

723

724 Mankin R (2022) *Subterranean Arthropod Biotremology: Ecological and Economic*  
725 *Contexts*. In P. S. M. Hill, V. Mazzoni, N. Stritih-Peljhan, M. Virant-Doberlet, & A.  
726 Wessel (Eds.), *Biotremology: Physiology, Ecology, and Evolution*, 8:511–527.  
727 Springer International Publishing, New York.

728

729 Martins da Silva P, Berg MP, Serrano AR, Dubs F, Sousa JP (2012) Environmental  
730 factors at different spatial scales governing soil fauna community patterns in  
731 fragmented forests. *Landscape Ecology*, 27:1337-1349.

732

733 Messier C, Bauhus J, Doyon F, Maure F, Sousa-Silva R, Nolet P, Mina M, Aquilué N,  
734 Fortin MJ, Puettmann K (2019) The functional complex network approach to foster  
735 forest resilience to global changes. *Forest Ecosystems*, 6:1-16.

736

737 Müller FG (2000) Does the convention on biodiversity safeguard biological  
738 diversity?. *Environmental Values*, 9:55-80.

739

740 Müller S, Gossner MM, Penone C, Jung K, Renner SC, Farina A, Anhäuser L, Ayasse  
741 M, Boch S, Haensel F, Heitzmann J (2022) Land-use intensity and landscape structure  
742 drive the acoustic composition of grasslands. *Agriculture, Ecosystems*  
743 *Environment*, 328:107845.

744

745 Nkem JN, Lobry de Bruyn L, King K (2020) The Effect of Increasing Topsoil  
746 Disturbance on Surface-Active Invertebrate Composition and Abundance under  
747 Grazing and Cropping Regimes on Vertisols in North-West New South Wales,  
748 Australia. *Insects*, 11:237.

749

750 O'Connor B, Bojinski S, Rösli C, Schaepman ME (2020) Monitoring global changes  
751 in biodiversity and climate essential as ecological crisis intensifies. *Ecological*  
752 *Informatics*, 55:101033.

753

754 Oksanen J, Simpson GL, Blanchet G, Kindt R, Legendre P, Minchin PR, O'Hara RB,  
755 Solymos P, Stevens H, Szoecs E, Wagner H, Barbour M, Bedward M, Bolker B,  
756 Borcard D, Carvalho G, Chirico M, Caceres MD, Duran S, Evangelista HBA, FitzJohn  
757 R, Friendly M, Furneaux B, Hannigan G, Hill MO, Lahti L, McGlinn D, Ouellette MH,  
758 Cunha ER, Smith T, Stier A, Braak CJFT, Weedon J (2022) *The Vegan community*  
759 *ecology package in R*. <https://cran.r-project.org/web/packages/lmerTest/index.html>  
760 (accessed on 10th November 2022).

761

762 Owen K, Mennill DJ, Campos FA, Fedigan LM, Gillespie TW, Melin AD (2020)  
763 Bioacoustic analyses reveal that bird communities recover with forest succession in  
764 tropical dry forests. *COPA*. <http://dx.doi.org/10.5751/ACE-01615-150125>

765

766 Pardos M, Del Río M, Pretzsch H, Jactel H, Bielak K, Bravo F, Brazaitis G, Defosse  
767 E, Engel M, Godvod K, Jacobs K (2021) The greater resilience of mixed forests to

768 drought mainly depends on their composition: Analysis along a climate gradient across  
769 Europe. *Forest Ecology Management*, 481:118687.

770

771 Pieretti N, Farina A, Morri D (2011) A new methodology to infer the singing activity of  
772 an avian community: The Acoustic Complexity Index (ACI). *Ecological*  
773 *Indicators*, 11:868-873.

774

775 Popper AN, Hawkins AD (2019) An overview of fish bioacoustics and the impacts of  
776 anthropogenic sounds on fishes. *Journal of Fish Biology*, 94:692-713.

777

778 R Core Team (2022) *R: A language and environment for statistical computing*. R  
779 Foundation for Statistical Computing, Vienna, Austria. <https://www.R-project.org/>  
780 (accessed on 10<sup>th</sup> November 2022).

781

782 Robinson JM, Cameron R, Parker B (2021) The effects of anthropogenic sound and  
783 artificial light exposure on microbiomes: ecological and public health  
784 implications. *Frontiers in Ecology and Evolution*, 9:662588.

785

786 Robinson JM, Watkins H, Man I, Liddicoat C, Cameron R, Parker B, Cruz M, Meagher  
787 L (2021) Microbiome-Inspired Green Infrastructure: a bioscience roadmap for urban  
788 ecosystem health. *ARQ*. 25:292-303.

789

790 Robinson JM, Harrison PA, Mavoja S, Breed MF (2022) Existing and emerging uses  
791 of drones in restoration ecology. *Methods in Ecology Evolution*, 13:1899-1911.

792

Soil ecoacoustics in forest restoration

793 Rodwell JS, Joint nature conservation committee (GB) (2006) *National vegetation*  
794 *classification: Users' handbook*. Joint nature conservation committee, Peterborough.

795

796 Sabu TK, Shiju RT (2010) Efficacy of pitfall trapping, Winkler and Berlese extraction  
797 methods for measuring ground-dwelling arthropods in moist deciduous forests in the  
798 Western Ghats. *Journal of Insect Science*, 10.

799

800 Sama S (2021) Strengthening the Role of Forests in Climate Change Mitigation  
801 through the European Union Forest Law Enforcement, Governance and Trade Action  
802 Plan. *Journal of Environmental Law and Policy*, 1:1.

803

804 Sangermano F (2022) Acoustic diversity of forested landscapes: Relationships to  
805 habitat structure and anthropogenic pressure. *Landscape and Urban*  
806 *Planning*, 226:104508.

807

808 Schmidt A, Schneider C, Decker P, Hohberg K, Römbke J, Lehmitz R, Bálint M (2022)  
809 Shotgun metagenomics of soil invertebrate communities reflects taxonomy, biomass,  
810 and reference genome properties. *Ecology and Evolution*, 12:e8991.

811

812 Seidl R, Turner MG (2022) Post-disturbance reorganization of forest ecosystems in a  
813 changing world. *Proceedings of the National Academy of*  
814 *Sciences*, 119:e2202190119.

815

816 Simard SW (2018) Mycorrhizal networks facilitate tree communication, learning, and  
817 memory. *In Memory and learning in plants*, 191-213. Springer, Cham.

Soil ecoacoustics in forest restoration

818

819 Singh S, Sharma A, Khajuria K, Singh J, Vig AP (2020). Soil properties changes  
820 earthworm diversity indices in different agro-ecosystem. *BMC Ecology*, 20:1-14.

821

822 Smith RG, McSwiney CP, Grandy AS, Suwanwaree P, Snider RM, Robertson GP  
823 (2008) Diversity and abundance of earthworms across an agricultural land-use  
824 intensity gradient. *Soil Tilling Research*, 100:83-88.

825

826 Stanturf JA, Palik BJ, Williams MI, Dumroese RK, Madsen P (2014) Forest restoration  
827 paradigms. *Journal of Sustainable Forestry*, 33:S161-S194.

828

829 Stoddard MT, McGlone CM, Fulé PZ, Laughlin DC, Daniels ML (2011) Native plants  
830 dominate understory vegetation following ponderosa pine forest restoration  
831 treatments. *Western North American Naturalist*, 71:206-214.

832

833 Stowell D, Sueur J (2020) Ecoacoustics: acoustic sensing for biodiversity monitoring  
834 at scale. *Remote Sensing in Ecology and Conservation*, 6:217-219.

835

836 Stroud JL (2019) Soil health pilot study in England: Outcomes from an on-farm  
837 earthworm survey. *PLOS ONE*, 14:e0203909.

838

839 Sueur J, Aubin T, Simonis C (2008) Seewave, a free modular tool for sound analysis  
840 and synthesis. *Bioacoustics*, 18:213-226.

841

Soil ecoacoustics in forest restoration

842 Tashakor S, Chamani A (2021) Temporal variability of noise pollution attenuation by  
843 vegetation in urban parks. *Environmental Science and Pollution Research*, 28:23143-  
844 23151.

845

846 Taye FA, Folkersen MV, Fleming CM, Buckwell A, Mackey B, Diwakar KC, Le D,  
847 Hasan S, Saint Ange C (2021) The economic values of global forest ecosystem  
848 services: A meta-analysis. *Ecological Economics*, 189:107145.

849

850 Teixeira D, Maron M, van Rensburg BJ (2019) Bioacoustic monitoring of animal vocal  
851 behavior for conservation. *Conservation Science and Practice*, 1:e72.

852

853 Tidau S, Briffa M (2019) Anthropogenic noise pollution reverses grouping behaviour  
854 in hermit crabs. *Animal Behavior*, 151:113-120.

855

856 Turner A, Fischer M, Tzanopoulos J (2018) Sound-mapping a coniferous forest—  
857 Perspectives for biodiversity monitoring and noise mitigation. *PLOS ONE*,  
858 13:e0189843.

859

860 Yu Y, Zhao W, Martinez-Murillo JF, Pereira P (2020) Loess Plateau: from degradation  
861 to restoration. *Science of the Total Environment*, 738:140206.

862

863 van der Mescht AC, Pryke JS, Gaigher R, Samways MJ (2021) Ecological and  
864 acoustic responses of bush crickets to anthropogenic and natural  
865 ecotones. *Biodiversity Conservation*, 30:3859-3878.

866

Soil ecoacoustics in forest restoration

867 Vega-Hidalgo Á, Flatt E, Whitworth A, Symes L (2021) Acoustic assessment of  
868 experimental reforestation in a Costa Rican rainforest. *Ecological*  
869 *Indicators*, 133:108413.

870

871 Watson JE, Evans T, Venter O, Williams B, Tulloch A, Stewart C, Thompson I, Ray  
872 JC, Murray K, Salazar A, McAlpine C (2018) The exceptional value of intact forest  
873 ecosystems. *Nature Ecology and Evolution*, 2:599-610.

874

875 Wildlife Acoustics (2022) *Kaleidoscope Pro sound analysis software*.  
876 <https://www.wildlifeacoustics.com/products/kaleidoscope-pro> (accessed on 10th  
877 November 2022).

878

879 Williams-Linera G, Bonilla-Moheno M, López-Barrera F, Tolome J (2021) Litterfall,  
880 vegetation structure and tree composition as indicators of functional recovery in  
881 passive and active tropical cloud forest restoration. *Forest Ecology and*  
882 *Management*, 493:119260.

883

884 Wodika BR, Klopff RP, Baer SG (2014) Colonization and recovery of invertebrate  
885 ecosystem engineers during prairie restoration. *Restoration Ecology*, 22:456-464.

886

887 Zipkin EF, Zylstra ER, Wright AD, Saunders SP, Finley AO, Dietze MC, Itter MS  
888 Tingley MW (2021) Addressing data integration challenges to link ecological  
889 processes across scales. *Frontiers in Ecology and the Environment*, 19:30-38.

890

891
